# Supplementary material
Source: PubMed Central journal article supplement (PMC4100777)
Supplement: NIHMS479311-supplement-01.pdf [file NIHMS479311-supplement-01.pdf]

**Supplementary Table 1.** Incidence Rates and HRs of Incident HCC Stratified by Family History of HCC and HBV DNA Levels

| Characteristic                      | N    | HCC cases, n | Person-years of follow-up evaluation | Incidence rate per 100,000 person-years | Crude HR (95% CI)  | Multivariate adjusted HR (95% CI) |
|-------------------------------------|------|--------------|--------------------------------------|-----------------------------------------|--------------------|-----------------------------------|
| Age, y                              |      |              |                                      |                                         | 1.07 (1.06–1.08)   | 1.08 (1.07–1.10)                  |
| BMI, kg/m <sup>2</sup>              |      |              |                                      |                                         | 1.04 (1.01–1.08)   | 1.05 (1.01–1.09)                  |
| Sex                                 |      |              |                                      |                                         |                    |                                   |
| Female                              | 1396 | 45           | 22,773.5                             | 197.6                                   | Referent           | Referent                          |
| Male                                | 2260 | 199          | 34,776.5                             | 572.2                                   | 2.90 (2.10–4.01)   | 2.25 (1.56–3.25)                  |
| Smoking habit                       |      |              |                                      |                                         |                    |                                   |
| No                                  | 2419 | 133          | 38,876.1                             | 342.1                                   | Referent           | Referent                          |
| Yes                                 | 1234 | 110          | 18,622.9                             | 590.7                                   | 1.74 (1.35–2.24)   | 1.14 (0.86–1.52)                  |
| Alcohol consumption                 |      |              |                                      |                                         |                    |                                   |
| No                                  | 3198 | 189          | 50,820.3                             | 371.9                                   | Referent           | Referent                          |
| Yes                                 | 451  | 54           | 6633.0                               | 814.1                                   | 2.20 (1.62–2.97)   | 1.48 (1.08–2.04)                  |
| Diabetes                            |      |              |                                      |                                         |                    |                                   |
| No                                  | 3564 | 230          | 56,409.9                             | 407.7                                   | Referent           | Referent                          |
| Yes                                 | 85   | 14           | 1028.4                               | 1361.3                                  | 1.09 (0.89–1.35)   | 1.12 (0.87–1.44)                  |
| ALT level, U/L                      |      |              |                                      |                                         |                    |                                   |
| ≤45                                 | 3438 | 201          | 54,474.2                             | 369.0                                   | Referent           | Referent                          |
| >45                                 | 218  | 43           | 3075.8                               | 1398.0                                  | 3.80 (2.74–5.29)   | 2.70 (1.92–3.79)                  |
| HBeAg serostatus                    |      |              |                                      |                                         |                    |                                   |
| Negative                            | 3091 | 140          | 49,196.2                             | 284.6                                   | Referent           | Not included                      |
| Positive                            | 565  | 104          | 8353.8                               | 1244.9                                  | 4.41 (3.42–5.68)   |                                   |
| Family history of HCC               |      |              |                                      |                                         |                    |                                   |
| Negative                            | 3484 | 220          | 54,937.7                             | 400.5                                   | Referent           | Referent                          |
| Positive                            | 172  | 24           | 2612.3                               | 918.7                                   | 2.30 (1.51–3.51)   | 2.18 (0.78–6.08)                  |
| HBV DNA, copies/mL                  |      |              |                                      |                                         |                    |                                   |
| <10,000                             | 2035 | 45           | 32,851.6                             | 136.9                                   | Referent           | Referent                          |
| >10,000                             | 1621 | 199          | 24,698.4                             | 805.7                                   | 5.94 (4.30–8.21)   | 5.76 (4.08–8.12)                  |
| Family history of HCC/HBV DNA level |      |              |                                      |                                         |                    |                                   |
| No/<10,000                          | 1941 | 41           | 31,369.5                             | 130.7                                   | Referent           | Not included                      |
| Yes/<10,000                         | 94   | 4            | 1482.1                               | 269.9                                   | 2.07 (0.74–5.77)   |                                   |
| No/≥10,000                          | 1543 | 179          | 23,568.2                             | 759.5                                   | 5.87 (4.18–8.24)   |                                   |
| Yes/≥10,000                         | 78   | 20           | 1130.2                               | 1769.6                                  | 13.75 (8.05–23.47) |                                   |

**Supplementary Table 2.** Multivariate Adjusted HRs of HCC Incidence Showing Interaction Between Family HCC HBV DNA Levels

| Characteristic                      | Crude HR (95% CI)  | Model 2                      | Model 3                           | Model 4                           |
|-------------------------------------|--------------------|------------------------------|-----------------------------------|-----------------------------------|
|                                     |                    | Age/sex-adjusted HR (95% CI) | Multivariate adjusted HR (95% CI) | Multivariate adjusted HR (95% CI) |
| Sex                                 |                    |                              |                                   |                                   |
| Female                              | Referent           | Referent                     | Referent                          | Referent                          |
| Male                                | 2.90 (2.10–4.01)   | 2.68 (1.94–3.71)             | 2.32 (1.62–3.32)                  | 2.25 (1.56–3.25)                  |
| Age, y                              | 1.07 (1.06–1.08)   | 1.08 (1.06–1.09)             | 1.08 (1.07–1.10)                  | 1.08 (1.07–1.10)                  |
| BMI, kg/m <sup>2</sup>              | 1.04 (1.01–1.08)   |                              | 1.05 (1.01–1.09)                  | 1.05 (1.01–1.09)                  |
| Smoking habit                       |                    |                              |                                   |                                   |
| No                                  | Referent           |                              | Referent                          | Referent                          |
| Yes                                 | 1.74 (1.35–2.24)   |                              | 1.24 (0.93–1.64)                  | 1.14 (0.86–1.52)                  |
| Alcohol consumption                 |                    |                              |                                   |                                   |
| No                                  | Referent           |                              |                                   | Referent                          |
| Yes                                 | 2.20 (1.62–2.97)   |                              |                                   | 1.48 (1.08–2.04)                  |
| Diabetes                            |                    |                              |                                   |                                   |
| No                                  | Referent           |                              | Referent                          | Referent                          |
| Yes                                 | 1.09 (0.89–1.35)   |                              | 1.13 (0.88–1.45)                  | 1.12 (0.87–1.44)                  |
| ALT level, U/L                      |                    |                              |                                   |                                   |
| ≤45                                 | Referent           |                              | Referent                          | Referent                          |
| >45                                 | 3.80 (2.74–5.29)   |                              | 2.78 (1.99–3.89)                  | 2.70 (1.92–3.79)                  |
| Family history of HCC/HBV DNA level |                    |                              |                                   |                                   |
| No/<10,000                          | Referent           | Referent                     | Referent                          | Referent                          |
| Yes/<10,000                         | 2.07 (0.74–5.77)   | 2.22 (0.79–6.19)             | 2.19 (0.79–6.12)                  | 2.18 (0.78–6.08)                  |
| No/≥10,000                          | 5.87 (4.18–8.24)   | 6.26 (4.45–8.79)             | 5.79 (4.11–8.16)                  | 5.76 (4.08–8.12)                  |
| Yes/≥10,000                         | 13.75 (8.05–23.47) | 15.95 (9.32–27.28)           | 16.46 (9.57–28.29)                | 15.72 (9.06–27.27)                |

**Supplementary Table 3.** Incidence Rates and HRs of Incident HCC Stratified by Family History of HCC and HBeAg

| Characteristic                         | N    | HCC cases, n | Person-years of follow-up evaluation | Incidence rate per 100,000 person-years | Crude HR (95% CI)  | Multivariate adjusted HR (95% CI) |
|----------------------------------------|------|--------------|--------------------------------------|-----------------------------------------|--------------------|-----------------------------------|
| Age, y                                 |      |              |                                      |                                         | 1.07 (1.06–1.08)   | 1.10 (1.08–1.11)                  |
| BMI, kg/m <sup>2</sup>                 |      |              |                                      |                                         | 1.04 (1.01–1.08)   | 1.04 (1.00–1.08)                  |
| Sex                                    |      |              |                                      |                                         |                    |                                   |
| Female                                 | 1396 | 45           | 22,773.5                             | 197.6                                   | Referent           | Referent                          |
| Male                                   | 2260 | 199          | 34,776.5                             | 572.2                                   | 2.90 (2.10–4.01)   | 2.52 (1.74–3.64)                  |
| Smoking habit                          |      |              |                                      |                                         |                    |                                   |
| No                                     | 2419 | 133          | 38,876.1                             | 342.1                                   | Referent           | Referent                          |
| Yes                                    | 1234 | 110          | 18,622.9                             | 590.7                                   | 1.74 (1.35–2.24)   | 1.19 (0.89–1.58)                  |
| Alcohol consumption                    |      |              |                                      |                                         |                    |                                   |
| No                                     | 3198 | 189          | 50,820.3                             | 371.9                                   | Referent           | Referent                          |
| Yes                                    | 451  | 54           | 6633.0                               | 814.1                                   | 2.20 (1.62–2.97)   | 1.43 (1.04–1.97)                  |
| Diabetes                               |      |              |                                      |                                         |                    |                                   |
| No                                     | 3564 | 230          | 56,409.9                             | 407.7                                   | Referent           | Referent                          |
| Yes                                    | 85   | 14           | 1028.4                               | 1361.3                                  | 1.09 (0.89–1.35)   | 1.05 (0.82–1.36)                  |
| ALT level, U/L                         |      |              |                                      |                                         |                    |                                   |
| ≤45                                    | 3438 | 201          | 54,474.2                             | 369.0                                   | Referent           | Referent                          |
| >45                                    | 218  | 43           | 3075.8                               | 1398.0                                  | 3.80 (2.74–5.29)   | 2.26 (1.59–3.21)                  |
| HBV DNA, copies/mL                     |      |              |                                      |                                         |                    |                                   |
| <10,000                                | 2035 | 45           | 32,851.6                             | 136.9                                   | Referent           | Not included                      |
| >10,000                                | 1621 | 199          | 24,698.4                             | 805.7                                   | 5.94 (4.30–8.21)   |                                   |
| Family history of HCC                  |      |              |                                      |                                         |                    |                                   |
| Negative                               | 3484 | 220          | 54,937.7                             | 400.5                                   | Referent           | Referent                          |
| Positive                               | 172  | 24           | 2612.3                               | 918.7                                   | 2.30 (1.51–3.51)   | 2.19 (1.21–3.96)                  |
| HBeAg serostatus                       |      |              |                                      |                                         |                    |                                   |
| Negative                               | 3091 | 140          | 49,196.2                             | 284.6                                   | Referent           | Referent                          |
| Positive                               | 565  | 104          | 8353.8                               | 1244.9                                  | 4.41 (3.42–5.68)   | 6.08 (4.53–8.15)                  |
| Family history of HCC/HBeAg serostatus |      |              |                                      |                                         |                    |                                   |
| No/HBeAg (-)                           | 2951 | 128          | 46,999.7                             | 272.3                                   | Referent           | Not included                      |
| Yes/HBeAg (-)                          | 140  | 12           | 2196.5                               | 546.3                                   | 2.01 (1.11–3.63)   |                                   |
| No/HBeAg (+)                           | 533  | 92           | 7938.1                               | 1159.0                                  | 4.28 (3.28–5.60)   |                                   |
| Yes/HBeAg (+)                          | 32   | 12           | 415.8                                | 2886.2                                  | 10.86 (6.01–19.62) |                                   |

**Supplementary Table 4.** Multivariate Adjusted HRs of HCC Incidence Showing Interaction Between Family HCC and HBeAg Status

| Characteristic                         | Crude HR (95% CI)  | Model 2                      | Model 3                           | Model 4                           |
|----------------------------------------|--------------------|------------------------------|-----------------------------------|-----------------------------------|
|                                        |                    | Age/sex-adjusted HR (95% CI) | Multivariate adjusted HR (95% CI) | Multivariate adjusted HR (95% CI) |
| Sex                                    |                    |                              |                                   |                                   |
| Female                                 | Referent           | Referent                     | Referent                          | Referent                          |
| Male                                   | 2.90 (2.10-4.01)   | 2.98 (2.16-4.12)             | 2.60 (1.81-3.73)                  | 2.52 (1.74-3.64)                  |
| Age, y                                 | 1.07 (1.06-1.08)   | 1.10 (1.08-1.11)             | 1.10 (1.08-1.11)                  | 1.10 (1.08-1.11)                  |
| BMI, kg/m <sup>2</sup>                 | 1.04 (1.01-1.08)   |                              | 1.04 (1.00-1.08)                  | 1.04 (1.00-1.08)                  |
| Smoking habit                          |                    |                              |                                   |                                   |
| No                                     | Referent           |                              | Referent                          | Referent                          |
| Yes                                    | 1.74 (1.35-2.24)   |                              | 1.26 (0.95-1.67)                  | 1.19 (0.89-1.58)                  |
| Alcohol consumption                    |                    |                              |                                   |                                   |
| No                                     | Referent           |                              |                                   | Referent                          |
| Yes                                    | 2.20 (1.62-2.97)   |                              |                                   | 1.43 (1.04-1.97)                  |
| Diabetes                               |                    |                              |                                   |                                   |
| No                                     | Referent           |                              | Referent                          | Referent                          |
| Yes                                    | 1.09 (0.89-1.35)   |                              | 1.06 (0.82-1.38)                  | 1.05 (0.82-1.36)                  |
| ALT level, U/L                         |                    |                              |                                   |                                   |
| ≤45                                    | Referent           |                              | Referent                          | Referent                          |
| >45                                    | 3.80 (2.74-5.29)   |                              | 2.33 (1.64-3.29)                  | 2.26 (1.59-3.21)                  |
| Family history of HCC/HBeAg serostatus |                    |                              |                                   |                                   |
| No/HBeAg negative                      | Referent           | Referent                     | Referent                          | Referent                          |
| Yes/HBeAg negative                     | 2.01 (1.11-3.63)   | 2.18 (1.21-3.95)             | 2.21 (1.22-3.99)                  | 2.19 (1.21-3.96)                  |
| No/HBeAg positive                      | 4.28 (3.28-5.60)   | 7.17 (5.43-9.48)             | 6.16 (4.60-8.26)                  | 6.08 (4.53-8.15)                  |
| Yes/HBeAg positive                     | 10.86 (6.01-19.62) | 21.03 (11.50-38.46)          | 21.68 (11.80-39.83)               | 20.14 (10.71-37.87)               |
